# Supplementary material
Source: Royal Society of Chemistry journal article supplement (doi:10.1039/d6py00229c)
Supplement: d6py00229c1.pdf [file d6py00229c1.pdf]

# **Trimethylamine N-oxide (TMAO)-grafted silicone hydrogels for anti-fibrosis**

Xiangyu Dang<sup>a</sup>, Chongyu Zhu<sup>a,\*</sup>, Zhize Chen<sup>a,\*</sup>

- a. Key Lab of Sustainable Low-carbon Technologies for Textile Dyeing and Finishing, Ministry of Education, College of Chemistry and Chemical Engineering, Donghua University, Shanghai 201620, China

\*Corresponding author.

E-mail address: czhu@dhu.edu.cn

E-mail address: chenzhize@dhu.edu.cn

Table S1 Elemental analysis results

|                        |          |         |         |
|------------------------|----------|---------|---------|
| TMAO <sub>50</sub> -Si | C:46.81% | H:8.85% | N:0.05% |
| TMAO <sub>60</sub> -Si | C:48.27% | H:9.01  | N:3.76% |
| TMAO <sub>70</sub> -Si | C:46.03% | H:9.25  | N:4.23  |

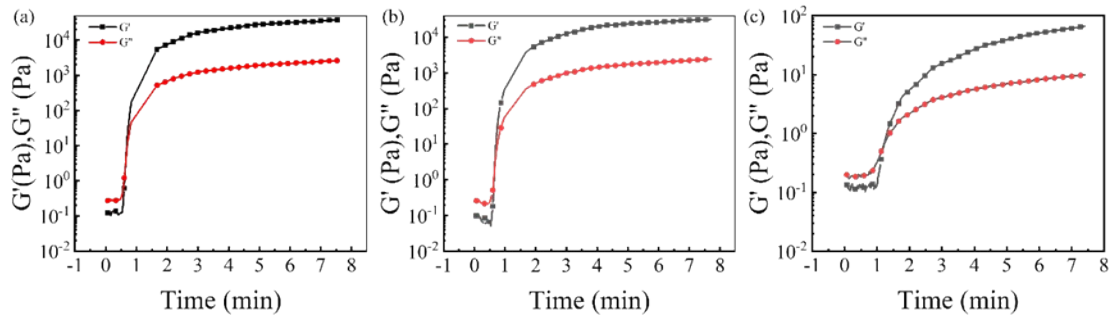

Fig. S1. Rheological property tests, (a) TMAO<sub>50</sub>-Si, (b) TMAO<sub>60</sub>-Si, (c) TMAO<sub>70</sub>-Si

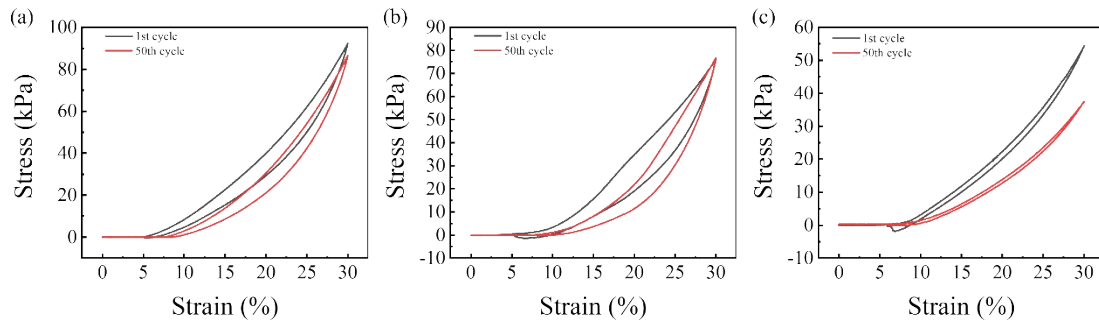

Fig. S2. Fatigue resistance test, (a) TMAO<sub>50</sub>-Si, (b) TMAO<sub>60</sub>-Si, (c) TMAO<sub>70</sub>-Si

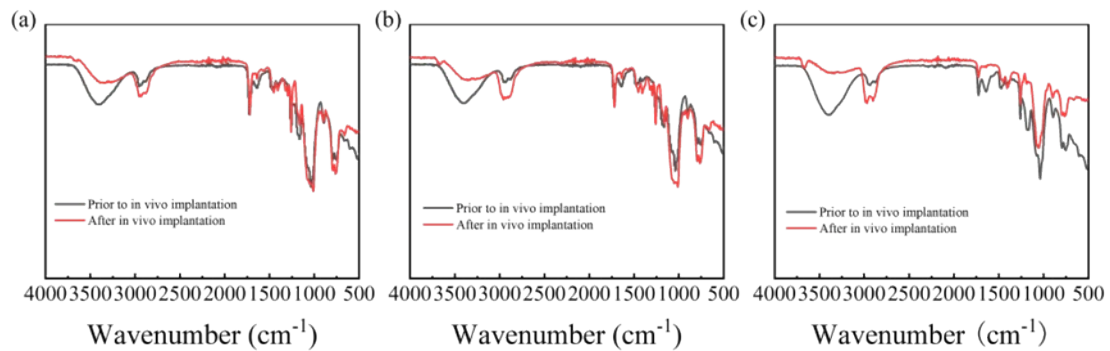

Fig. S3. FT-IR spectra before and after in vivo extraction

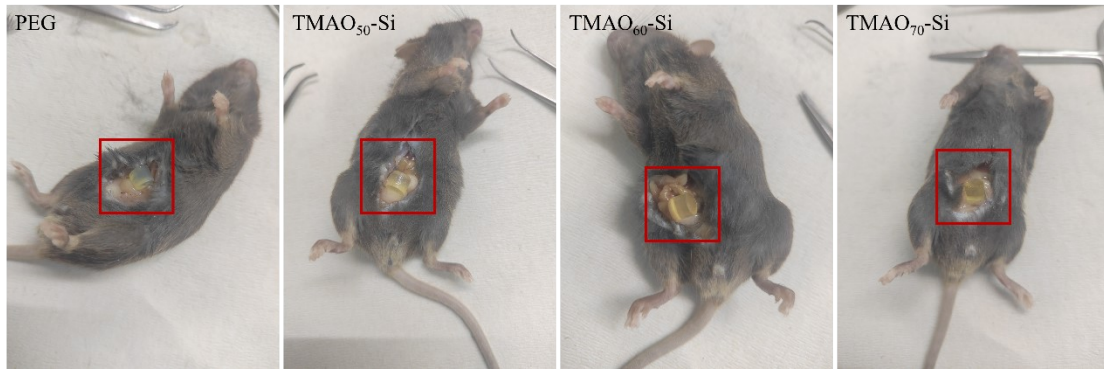

Fig. S4. Photos of hydrogel samples after in vivo retrieval.

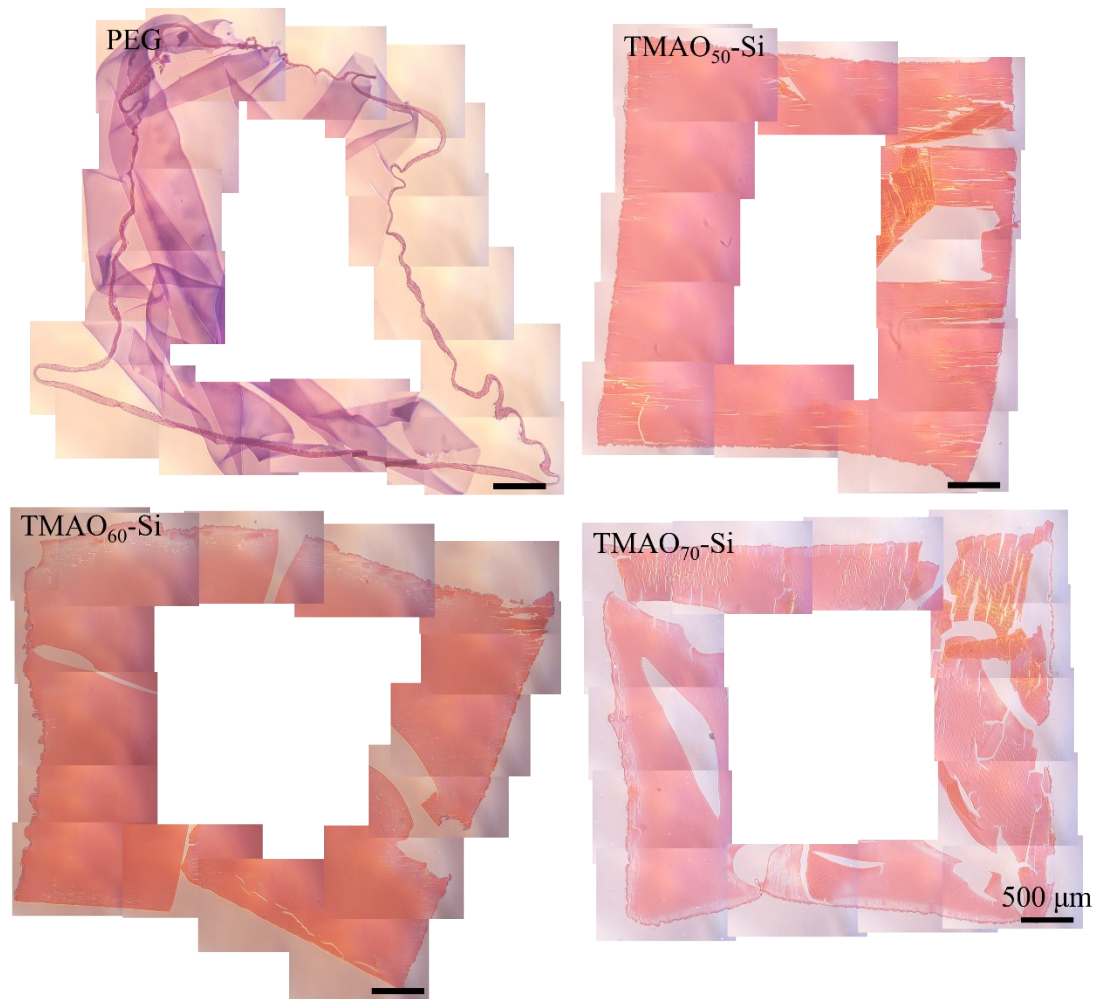

Fig. S5. H&E staining images of hydrogels at 14 days after subcutaneous implantation in mice.

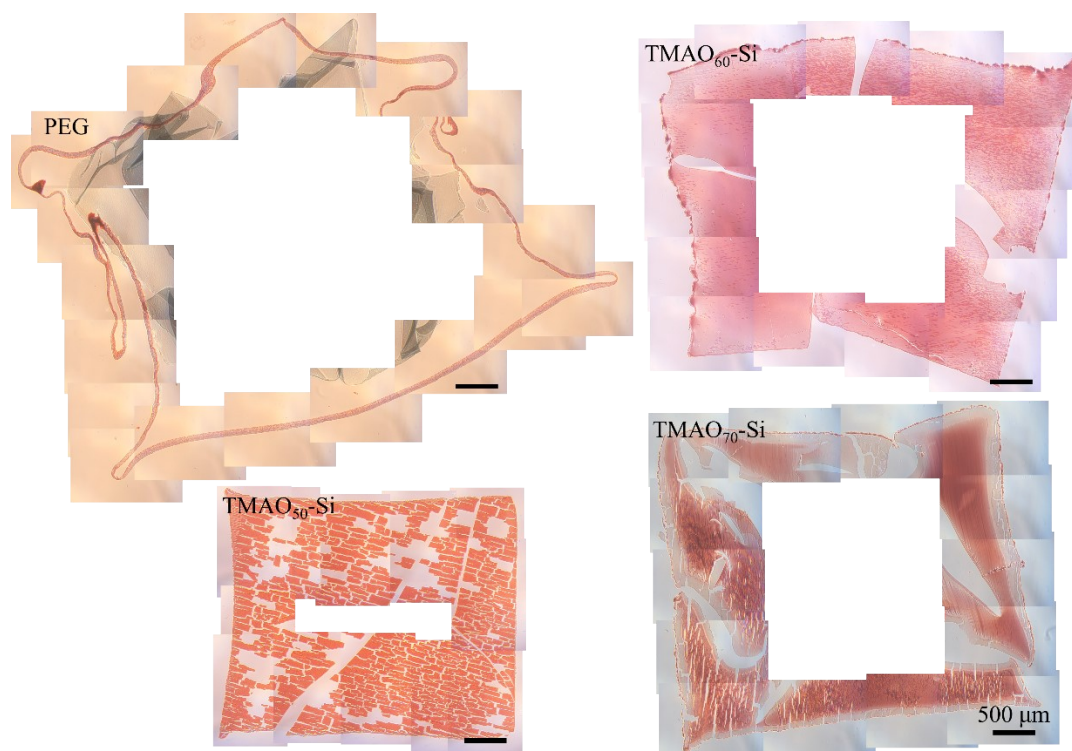

Fig. S6. Masson staining images of the hydrogel at 14 days after subcutaneous implantation in mice.

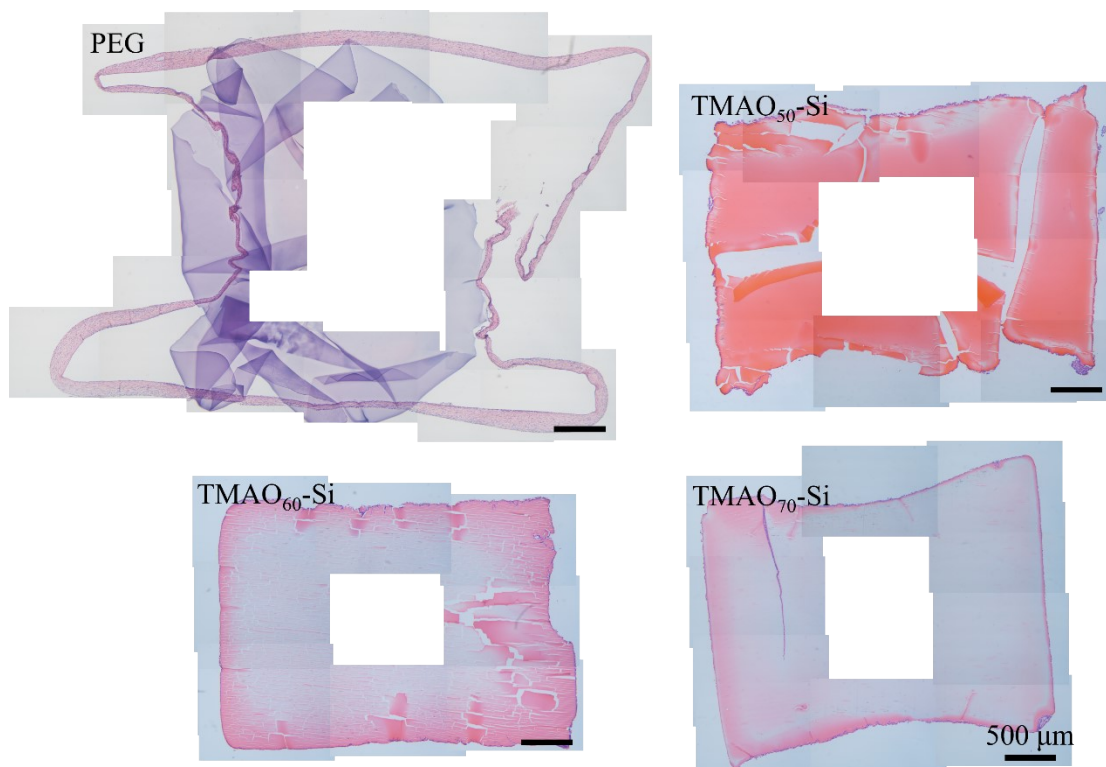

Fig. S7. H&E staining images of the hydrogel at 28 days after subcutaneous implantation in mice.

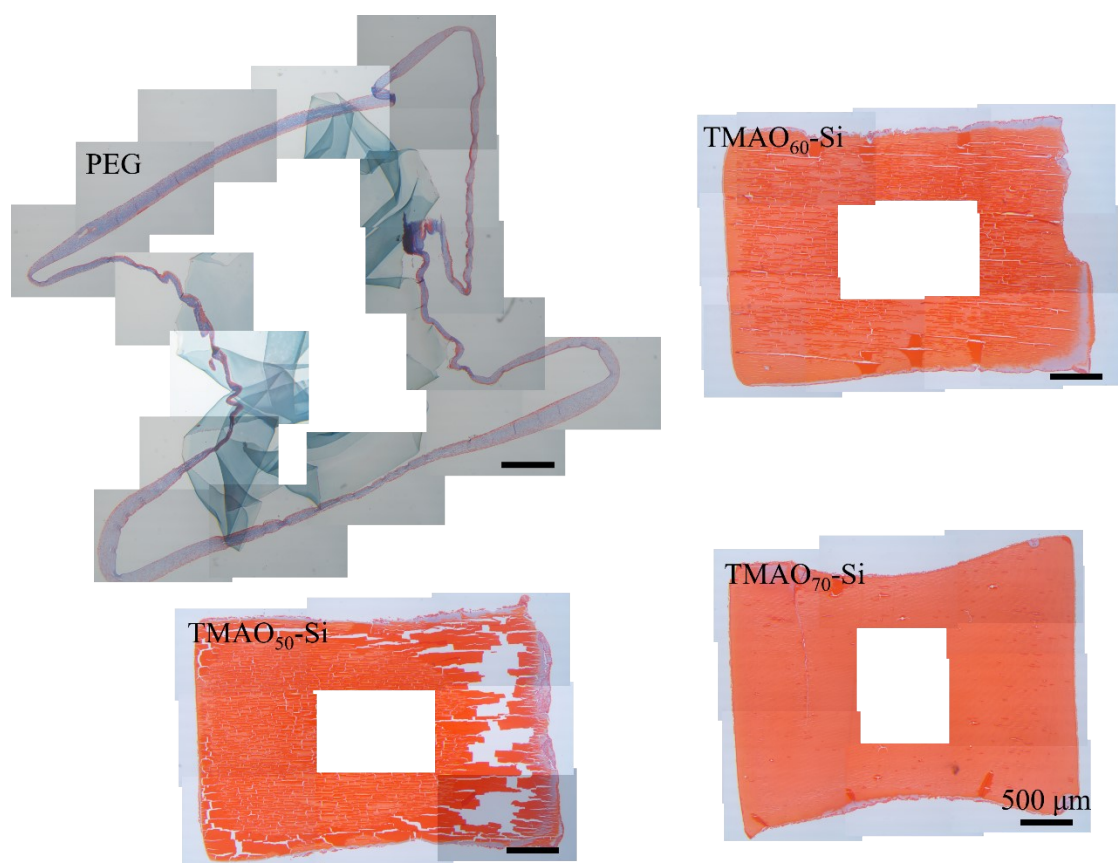

Fig. S8. Masson staining images of the hydrogel at 28 days after subcutaneous implantation in mice.
